# Supplementary material for: Fish Oil Increases Diet-Induced Thermogenesis in Mice
Source: MDPI journal article supplement (doi:10.3390/md19050278), 2021-05-17
Supplement: s1 [file s1]

**Table S1.** Effect of fish oil (FO) supplementation on gene expression in liver.

|                                 | Con              | FO                |
|---------------------------------|------------------|-------------------|
| Fatty acid $\beta$ -oxidation   |                  |                   |
| <i>Ppar <math>\alpha</math></i> | 100.0 $\pm$ 10.8 | 100.9 $\pm$ 10.8  |
| <i>Mcad</i>                     | 100.0 $\pm$ 9.0  | 181.3 $\pm$ 19.7* |
| <i>CptI</i>                     | 100.0 $\pm$ 18.7 | 68.9 $\pm$ 7.3    |
| <i>Aco</i>                      | 100.0 $\pm$ 14.0 | 152.3 $\pm$ 21.5  |
| <i>Ucp2</i>                     | 100.0 $\pm$ 25.2 | 178.3 $\pm$ 45.0  |
| Fatty acid synthesis            |                  |                   |
| <i>Srebp-1c</i>                 | 100.0 $\pm$ 10.3 | 66.4 $\pm$ 12.8   |
| <i>Fas</i>                      | 100.0 $\pm$ 24.4 | 20.4 $\pm$ 4.8*   |
| <i>Scd1</i>                     | 100.0 $\pm$ 16.9 | 9.1 $\pm$ 2.5**   |
| <i>Acc1</i>                     | 100.0 $\pm$ 23.3 | 33.9 $\pm$ 8.2*   |

Values are mean  $\pm$  SEM (n = 7). Con: control; FO: fish oil. \*p < 0.05, \*\*p < 0.01 vs. Con-fed mice.
